# Supplementary material for: Specific brain activation patterns associated with two neuromuscular electrical stimulation protocols
Source: PubMed Central journal article supplement (PMC5457446; doi:10.1038/s41598-017-03188-9), 2017-06-02
Supplement: 41598_2017_3188_MOESM1_ESM.pdf [file 41598_2017_3188_MOESM1_ESM.pdf]

## **Specific brain activation patterns associated with two neuromuscular electrical stimulation protocols**

Jennifer Wegrzyk<sup>1</sup>, Jean-Philippe Ranjeva<sup>1</sup>, Alexandre Fouré<sup>1</sup>, Anne Kavounoudias<sup>2</sup>, Christophe Vilmen<sup>1</sup>, Jean-Pierre Mattei<sup>1,3</sup>, Maxime Guye<sup>1,4</sup>, Nicola A. Maffiuletti<sup>5</sup>, Nicolas Place<sup>6</sup>, David Bendahan<sup>1</sup>, Julien Gondin<sup>1,7,\*</sup>

<sup>1</sup> Aix Marseille Univ, CNRS, CRMBM, UMR 7339, 13385, Marseille, France.

<sup>2</sup> Aix Marseille Univ, CNRS, Laboratoire Neurosciences Intégratives et Adaptatives, UMR 7260, 13385, Marseille, France

<sup>3</sup> AP-HM, Hôpital de Sainte Marguerite, Service de Rhumatologie, Pôle Appareil Locomoteur, 13005, Marseille, France.

<sup>4</sup> AP-HM, Hôpital de la Timone, CEMEREM, Pôle Imagerie Médicale, 13005, Marseille, France.

<sup>5</sup> Schulthess Clinic, Human Performance Lab, 8008 Zurich, Switzerland.

<sup>6</sup> University of Lausanne, Faculty of Biology and Medicine, Institute of Sport Sciences and Department of Physiology, Lausanne, Switzerland.

<sup>7</sup> Current affiliation : Institut NeuroMyoGène, Université Claude Bernard Lyon 1, INSERM U1217, CNRS UMR 5310, Villeurbanne, France.

\* julien.gondin@univ-lyon1.fr

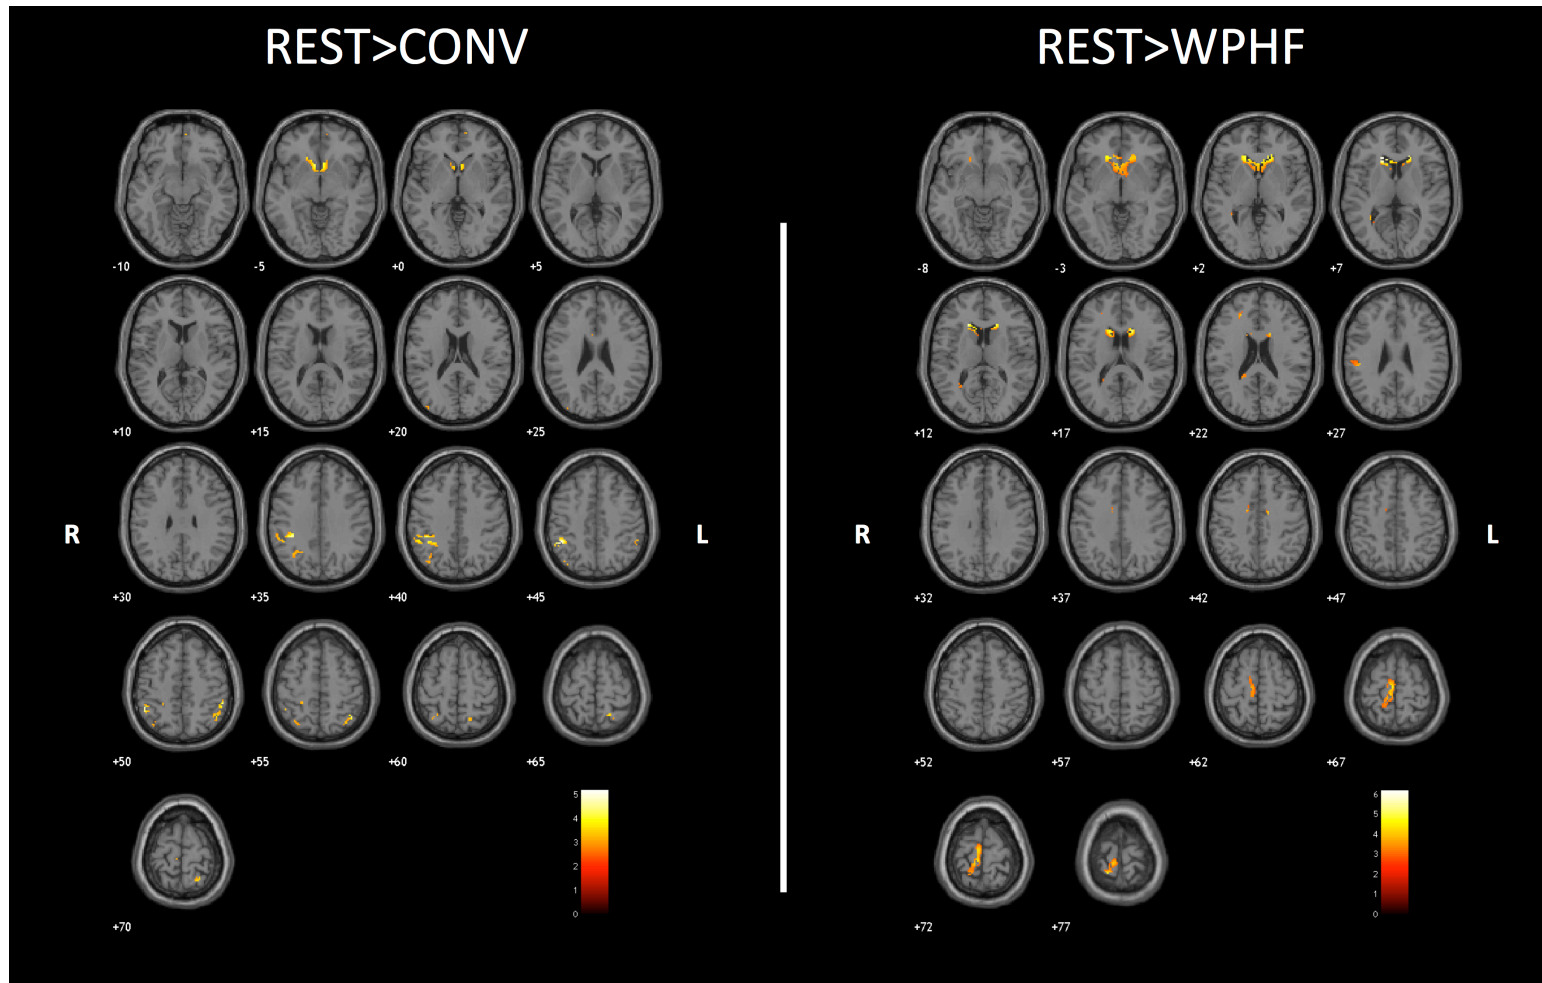

**Supplemental Figure 1.** Group deactivation maps ( $p < 0.005$ ;  $k = 20$ ; FDR corrected at cluster level  $p < 0.05$ ) during CONV and WPHF protocols performed at 10% of maximal voluntary contraction force as compared to rest. Statistical maps were coregistered with the SPM-MNI single subject  $T_1$  images. The color scale represents the T values. R: right hemisphere; L: left hemisphere.

**SUPPLEMENTAL TABLE 1** - Brain regions activated during VOL, CONV and WPHF protocols compared to rest *when considering the respective mean force as a regressor* ( $p < 0.005$ ;  $k = 20$ ; FDR corrected at cluster level  $p < 0.05$ )

| Protocols | Regions (Brodmann area)            | Side | Cluster size (k) | MNI coordinates |     |     | T    |
|-----------|------------------------------------|------|------------------|-----------------|-----|-----|------|
|           |                                    |      |                  | x               | y   | z   |      |
| VOL>REST  | <i>Posterior cerebellum</i>        | R    | 28835            | 38              | -68 | -18 | 7.98 |
|           | <i>Precentral gyrus (4)</i>        | L    |                  | -34             | -18 | 54  | 7.75 |
|           | <i>Posterior cerebellum</i>        | R    |                  | 46              | -60 | -22 | 7.73 |
|           | <i>Middle occipital gyrus (19)</i> | R    |                  | 26              | -84 | 14  | 7.09 |
|           | <i>Fusiform gyrus (37)</i>         | L    |                  | -50             | -64 | -14 | 6.83 |
|           | <i>Fusiform gyrus (19)</i>         | L    |                  | -24             | -64 | -6  | 6.62 |
|           | <i>Orbital gyri (18)</i>           | L    |                  | -38             | -84 | 4   | 6.59 |
|           | <i>Anterior cerebellum</i>         | L    |                  | -6              | -46 | 0   | 6.47 |
|           | <i>Putamen</i>                     | R    |                  | 32              | -10 | -8  | 6.46 |
|           | <i>Cuneus (18)</i>                 | L    |                  | -22             | -94 | 14  | 6.38 |
|           | <i>Posterior cerebellum</i>        | R    |                  | 26              | -78 | -14 | 6.28 |
|           | <i>Precuneus (7)</i>               | L    |                  | -4              | -56 | 50  | 6.27 |
|           | <i>Lingual gyrus (17)</i>          | R    |                  | 18              | -90 | -4  | 6.27 |
|           | <i>Lingual gyrus (18)</i>          | L    |                  | -22             | -90 | 4   | 6.24 |
|           | <i>Middle occipital gyrus (19)</i> | R    |                  | 34              | -74 | 0   | 6.23 |
|           | <i>Putamen</i>                     | L    |                  | -32             | -16 | -6  | 6.2  |
| CONV>REST | <i>Lingual gyrus (19)</i>          | L    | 6374             | -28             | -68 | -8  | 6.53 |
|           | <i>Anterior cerebellum</i>         | L    |                  | -2              | -42 | -24 | 6.51 |
|           | <i>Posterior cerebellum</i>        | R    |                  | 22              | -84 | -16 | 6.48 |
|           | <i>Anterior cerebellum</i>         | R    |                  | 12              | -56 | -16 | 6.13 |
|           | <i>Anterior cerebellum</i>         | L    |                  | -18             | -58 | -18 | 6.13 |
|           | <i>Lingual gyrus (18)</i>          | R    |                  | 6               | -68 | 2   | 5.82 |
|           | <i>Posterior cerebellum</i>        | L    |                  | -18             | -72 | -16 | 5.82 |
|           | <i>Anterior cerebellum</i>         | R    |                  | 10              | -48 | -6  | 5.77 |
|           | <i>Cerebellum</i>                  | R    |                  | 4               | -44 | 4   | 5.64 |
|           | <i>Posterior cerebellum</i>        | R    |                  | 22              | -66 | -18 | 5.62 |
|           | <i>Anterior cerebellum</i>         | R    |                  | 20              | -62 | -20 | 5.6  |
|           | <i>Posterior cerebellum</i>        | R    |                  | 28              | -68 | -22 | 5.42 |
|           | <i>Posterior cerebellum</i>        | R    |                  | 12              | -72 | -16 | 5.38 |
|           | <i>Posterior cerebellum</i>        | L    |                  | -18             | -66 | -16 | 5.37 |
|           | <i>Orbital gyri (18)</i>           | L    |                  | -38             | -84 | 4   | 5.31 |
|           | <i>Lingual gyrus (18)</i>          | L    |                  | -24             | -56 | 0   | 5.15 |

(continued on next page)

| Protocols | Regions (Brodmann area)              | Side                   | Cluster size (k) | MNI coordinates |     |     | T    |      |
|-----------|--------------------------------------|------------------------|------------------|-----------------|-----|-----|------|------|
|           |                                      |                        |                  | x               | y   | z   |      |      |
| CONV>REST | <i>Insula</i>                        | L                      | 2126             | -34             | -20 | 10  | 6.21 |      |
|           | <i>Inferior parietal lobule (40)</i> | L                      |                  | -64             | -16 | 12  | 5.94 |      |
|           | <i>Putamen</i>                       | L                      |                  | -30             | -4  | -10 | 5.46 |      |
|           | <i>Superior temporal gyrus (22)</i>  | L                      |                  | -54             | -10 | -10 | 5.44 |      |
|           | <i>Superior temporal gyrus (22)</i>  | L                      |                  | -56             | -16 | -8  | 5.12 |      |
|           | <i>Superior temporal gyrus (22)</i>  | L                      |                  | -52             | -16 | -4  | 5.03 |      |
|           | <i>Superior temporal gyrus (38)</i>  | L                      |                  | -46             | 8   | -24 | 4.98 |      |
|           | <i>Hippocampus</i>                   | L                      |                  | -32             | -8  | -20 | 4.83 |      |
|           | <i>Caudate nucleus</i>               | L                      |                  | -36             | -22 | -8  | 4.73 |      |
|           | <i>Insula</i>                        | L                      |                  | -44             | -6  | -6  | 4.47 |      |
|           | <i>Hippocampus</i>                   | L                      |                  | -28             | -28 | -8  | 4.37 |      |
|           | <i>Putamen</i>                       | L                      |                  | -30             | 14  | -6  | 4.36 |      |
|           | <i>Precentral gyrus (6)</i>          | L                      |                  | -48             | -4  | 4   | 4.24 |      |
|           | <i>Putamen</i>                       | L                      |                  | -28             | 8   | -6  | 4.19 |      |
|           | <i>Inferior parietal lobule (40)</i> | L                      |                  | -54             | -22 | 14  | 3.88 |      |
|           | <i>Caudate nucleus</i>               | L                      |                  | -34             | -30 | -2  | 3.87 |      |
|           |                                      | <i>Caudate nucleus</i> | R                | 776             | 14  | 6   | -14  | 6.15 |
|           |                                      | <i>Thalamus</i>        | R                |                 | 0   | -6  | 0    | 5.92 |
|           |                                      | <i>Thalamus</i>        | L                |                 | -4  | -2  | 4    | 5.83 |
|           |                                      | <i>Thalamus</i>        | R                |                 | 8   | -2  | -8   | 5.07 |
|           | <i>Caudate nucleus</i>               | L                      |                  | -18             | -4  | 18  | 3.44 |      |
| WPHF>REST | <i>Precentral Gyrus (4)</i>          | L                      | 4286             | -60             | -4  | 20  | 5.96 |      |
|           | <i>Fusiform gyrus (19)</i>           | L                      |                  | -32             | -64 | -10 | 5.14 |      |
|           | <i>Fusiform gyrus (19)</i>           | L                      |                  | -28             | -66 | -8  | 4.77 |      |
|           | <i>Posterior cerebellum</i>          | R                      |                  | 32              | -70 | -10 | 4.69 |      |
|           | <i>Putamen</i>                       | L                      |                  | -24             | -18 | 8   | 4.68 |      |
|           | <i>Parahippocampal gyrus (19)</i>    | L                      |                  | -26             | -50 | -6  | 4.67 |      |
|           | <i>Lingual gyrus (18)</i>            | L                      |                  | -28             | -40 | -16 | 4.66 |      |
|           | <i>Anterior cerebellum</i>           | R                      |                  | 16              | -78 | -6  | 4.57 |      |
|           | <i>Fusiform gyrus (37)</i>           | L                      |                  | -24             | -44 | -14 | 4.57 |      |
|           | <i>Lateral globus pallidus</i>       | L                      |                  | -28             | -20 | 0   | 4.38 |      |
|           | <i>Parahippocampal gyrus (36)</i>    | L                      |                  | -30             | -36 | -14 | 4.37 |      |
|           | <i>Middle temporal gyrus (22)</i>    | L                      |                  | -46             | -30 | 4   | 4.31 |      |
|           | <i>Anterior cerebellum</i>           | L                      |                  | -32             | -52 | -12 | 4.17 |      |
|           | <i>Lingual gyrus (18)</i>            | R                      |                  | 10              | -86 | 8   | 4.15 |      |
|           | <i>Fusiform gyrus (37)</i>           | R                      |                  | 30              | -42 | -16 | 4.15 |      |
|           | <i>Lingual gyrus (18)</i>            | R                      |                  | 10              | -86 | 0   | 4.14 |      |

**SUPPLEMENTAL TABLE 2 – Differences in brain activation between VOL and NMES protocols**

( $p < 0.005$ ;  $k = 20$ ; FDR corrected at cluster level  $p < 0.05$ )

| Contrasts | Regions (Brodmann area)              | Side | Cluster size (k) | MNI coordinates |     |     | T    |
|-----------|--------------------------------------|------|------------------|-----------------|-----|-----|------|
|           |                                      |      |                  | x               | y   | z   |      |
| VOL>CONV  | <i>Cuneus (17)</i>                   | R    | 14357            | 12              | -92 | 4   | 7.57 |
|           | <i>Lingual gyrus (18)</i>            | R    |                  | 18              | -90 | 0   | 7.41 |
|           | <i>Middle temporal gyrus (18)</i>    | R    |                  | 24              | -88 | 8   | 6.7  |
|           | <i>Middle temporal gyrus (19)</i>    | R    |                  | 24              | -82 | 18  | 6.58 |
|           | <i>Middle temporal gyrus (18)</i>    | L    |                  | -22             | -92 | 12  | 6.11 |
|           | <i>Inferior temporal gyrus (19)</i>  | R    |                  | 34              | -82 | 4   | 6.03 |
|           | <i>Precuneus (7)</i>                 | R    |                  | 4               | -70 | 56  | 5.72 |
|           | <i>Cuneus (17)</i>                   | L    |                  | -12             | -90 | 14  | 5.67 |
|           | <i>Middle occipital gyrus (18)</i>   | L    |                  | -18             | -90 | 14  | 5.66 |
|           | <i>Precuneus (7)</i>                 | L    |                  | -8              | -56 | 44  | 5.62 |
|           | <i>Cuneus (17)</i>                   | L    |                  | -14             | -96 | 10  | 5.59 |
|           | <i>Cuneus (17)</i>                   | L    |                  | -10             | -90 | 10  | 5.59 |
|           | <i>Cuneus (17)</i>                   | L    |                  | -18             | -92 | 4   | 5.36 |
|           | <i>Lingual gyrus (18)</i>            | L    |                  | -6              | -82 | 6   | 5.16 |
|           | <i>Lingual gyrus (18)</i>            | L    |                  | -12             | -76 | 2   | 5.09 |
|           | <i>Cuneus (19)</i>                   | R    |                  | 6               | -86 | 36  | 4.99 |
| VOL>WPHF  | <i>Cuneus (17)</i>                   | L    | 12415            | -14             | -98 | 10  | 7.1  |
|           | <i>Lingual gyrus (18)</i>            | R    |                  | 18              | -90 | 0   | 6.54 |
|           | <i>Cerebellum</i>                    | R    |                  | 0               | -86 | -16 | 6.5  |
|           | <i>Cuneus (17)</i>                   | R    |                  | 10              | -92 | 6   | 6.36 |
|           | <i>Middle temporal gyrus (18)</i>    | L    |                  | -22             | -92 | 12  | 5.91 |
|           | <i>Posterior cerebellum</i>          | R    |                  | 22              | -78 | -14 | 5.83 |
|           | <i>Inferior occipital gyrus (18)</i> | R    |                  | 32              | -78 | 0   | 5.82 |
|           | <i>Posterior cerebellum</i>          | L    |                  | -24             | -72 | -16 | 5.65 |
|           | <i>Lingual gyrus (18)</i>            | L    |                  | -12             | -86 | -10 | 5.48 |
|           | <i>Posterior cerebellum</i>          | L    |                  | -22             | -64 | -16 | 5.46 |
|           | <i>Precuneus (7)</i>                 | R    |                  | 2               | -70 | 56  | 5.34 |
|           | <i>Anterior cerebellum</i>           | R    |                  | 6               | -70 | -8  | 5.33 |
|           | <i>Middle temporal gyrus (18)</i>    | R    |                  | 22              | -90 | 8   | 5.31 |
|           | <i>Lingual gyrus (18)</i>            | L    |                  | -8              | -92 | -4  | 5.22 |
|           | <i>Cuneus (19)</i>                   | R    |                  | 4               | -86 | 38  | 5.18 |
|           | <i>Anterior cerebellum</i>           | L    |                  | -2              | -66 | -4  | 5.16 |
| CONV>VOL  | <i>Caudate nucleus</i>               | L    | 645              | -10             | 6   | 14  | 5.86 |
|           | <i>Thalamus</i>                      | R    |                  | 0               | -6  | 2   | 5.47 |
|           | <i>Caudate nucleus</i>               | R    |                  | 6               | -2  | 14  | 4.34 |
|           | <i>Caudate nucleus</i>               | R    |                  | 10              | 4   | 16  | 4.29 |
|           | <i>Caudate nucleus</i>               | R    |                  | 18              | 6   | 16  | 4.02 |
|           | <i>Caudate nucleus</i>               | R    |                  | 20              | -2  | 14  | 3.4  |
|           | <i>Putamen</i>                       | R    |                  | 26              | 4   | 10  | 3.05 |
|           | <i>Putamen</i>                       | R    |                  | 26              | 0   | 8   | 2.81 |
|           | <i>Putamen</i>                       | R    |                  | 24              | -6  | 12  | 2.8  |
